# Supplementary material for: EZH2 promotes colorectal cancer stem-like cell expansion by activating p21cip1-Wnt/β-catenin signaling
Source: PubMed Central journal article supplement (PMC5173077; doi:10.18632/oncotarget.9236), 2016-05-09
Supplement: oncotarget-07-41540-s001.pdf [file oncotarget-07-41540-s001.pdf]

## EZH2 promotes colorectal cancer stem-like cell expansion by activating p21<sup>cip1</sup>-Wnt/ $\beta$ -catenin signaling

### SUPPLEMENTARY FIGURES

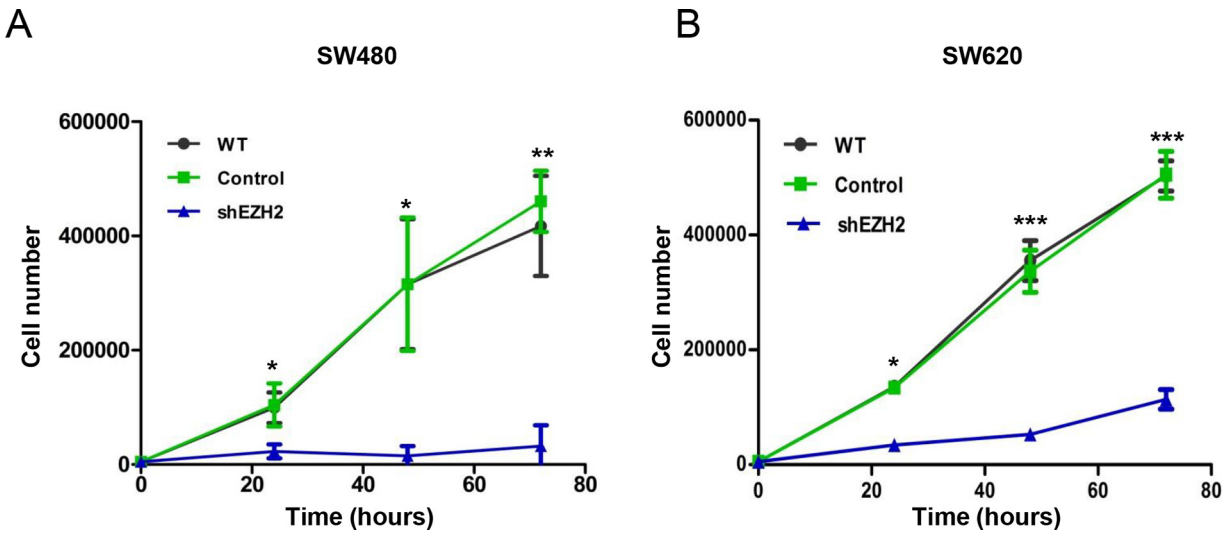

**Supplementary Figure S1: EZH2 promoted proliferation and clonogenicity of CRC cells.** EZH2 was knocked down in **A. SW480** and **B. SW620**. After 24, 48 and 72 hr of incubation, cell proliferation was measured by cell counting assay.

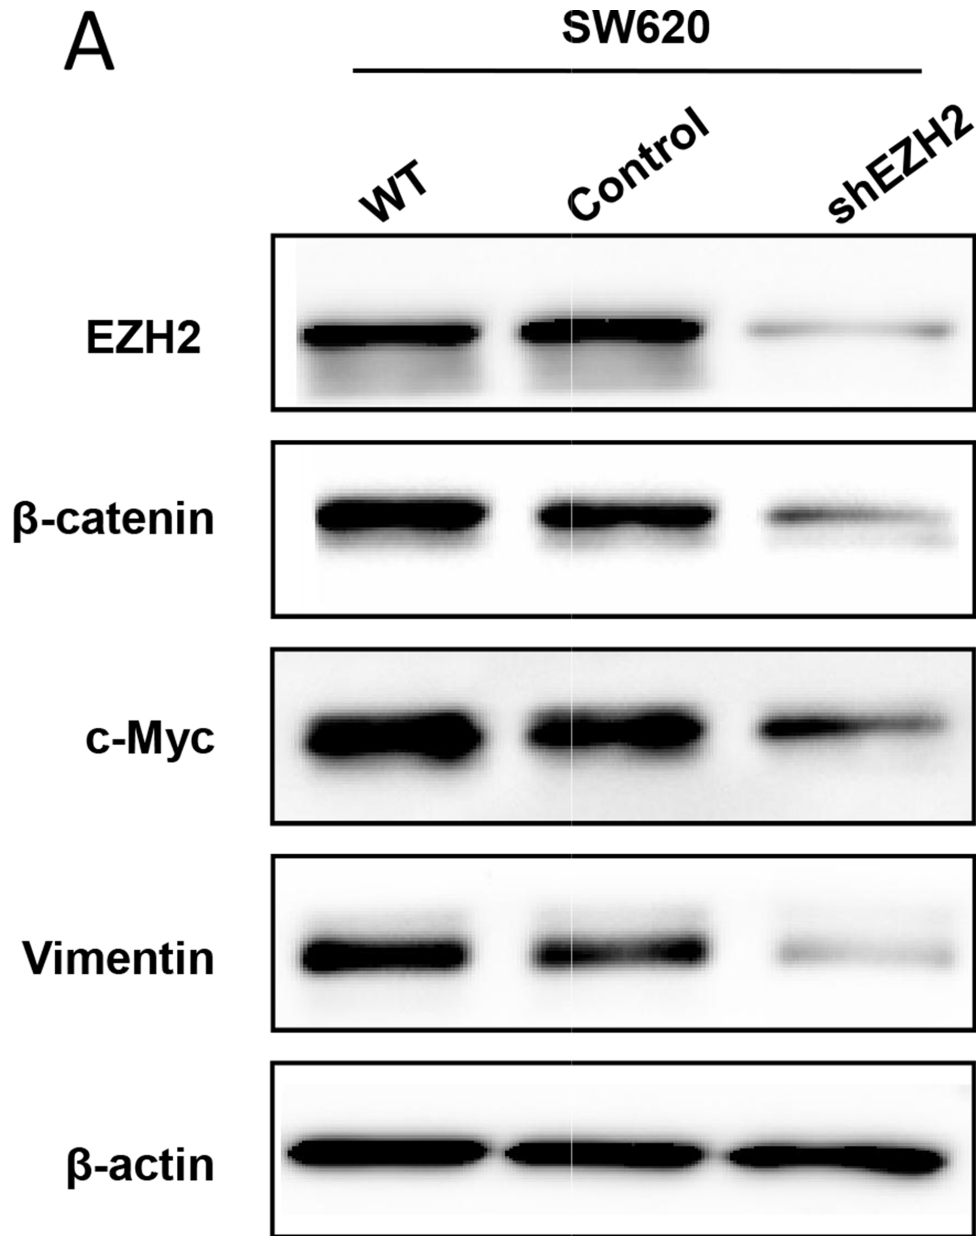

**Supplementary Figure S2: Silencing EZH2 expression inactivated Wnt/ $\beta$ -catenin signaling pathway in SW620 cell line.**  
A. The expression of  $\beta$ -catenin, vimentin and c-myc were detected by western blot after knockdown EZH2 in SW620 cells.

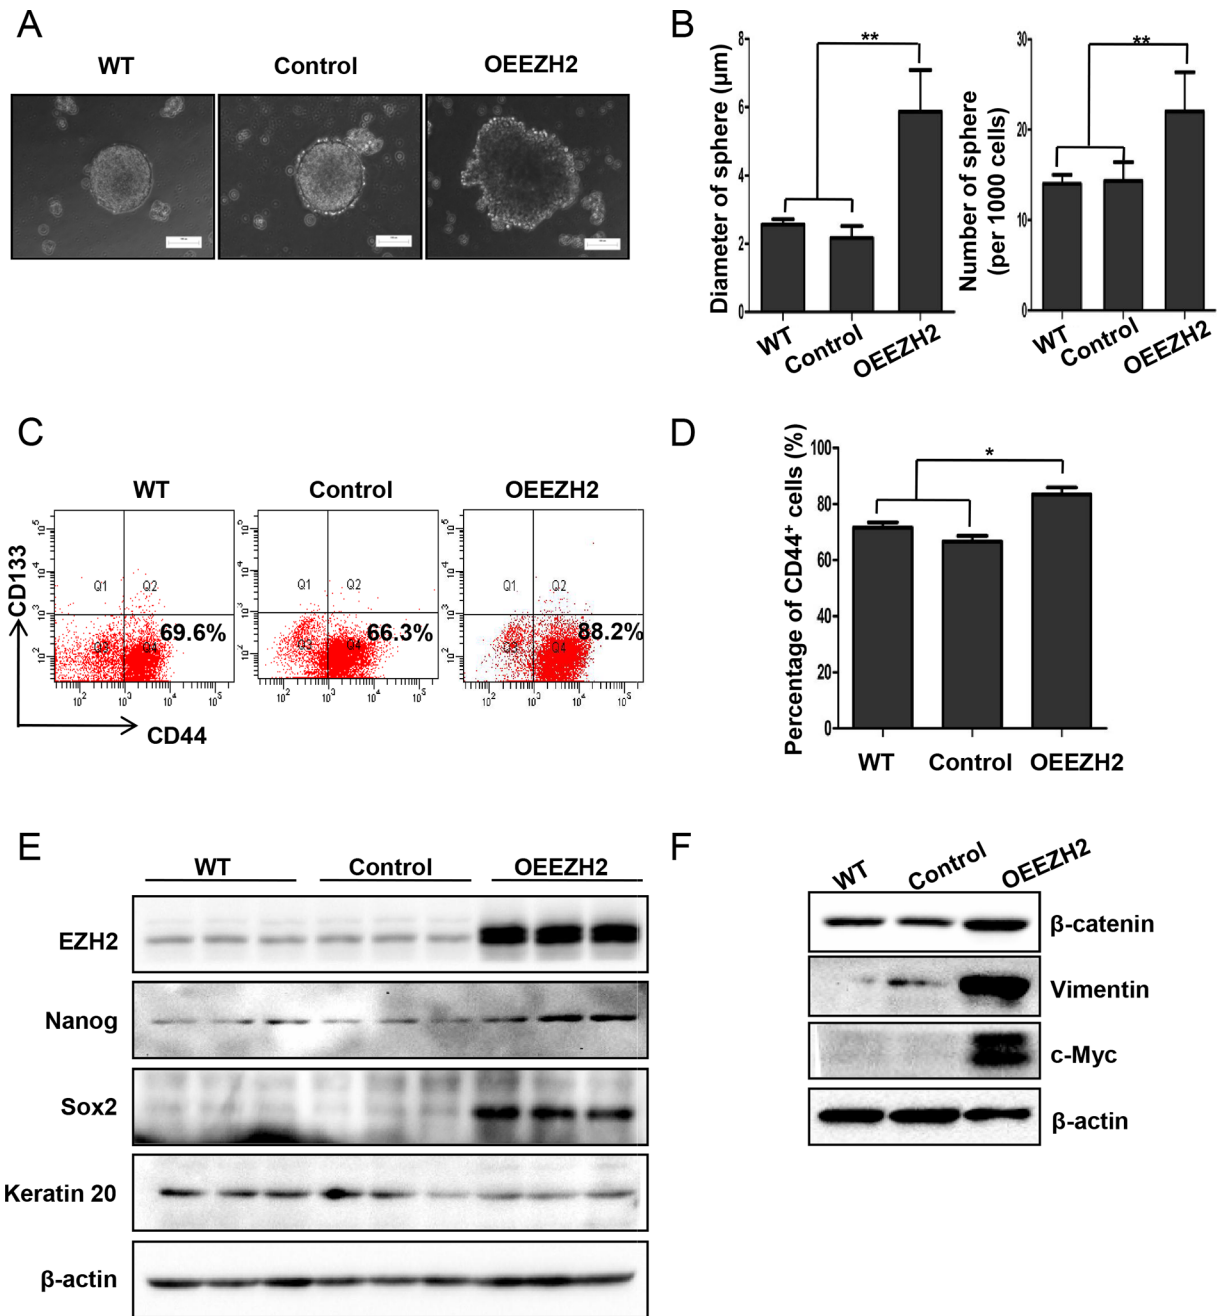

**Supplementary Figure S3: Overexpression EZH2 promoted stemness of LoVo cell line.** **A.** Wild type (WT), scramble OERNA (Control) and OEEZH2 of LoVo cells were plated in low-serum non-adherent culture conditions. Images were obtained by microscopy at 10× magnification and were representative of all mammospheres formed (Scale bar = 100 μm). **B.** The size and number of LoVo cell spheres were analyzed. Data were presented as the mean ± S.D. of three independent experiments. **C.** CD133<sup>+</sup>/CD44<sup>+</sup> population was analyzed by flow cytometry analysis in LoVo cells with or without EZH2 overexpression. **D.** The statistical results of three independent experiments were presented. **E.** After EZH2 knockdown, the expression of EZH2, Nanog, Sox2, and Keratin 20 was examined by western blot. **F.** The expression of β-catenin, vimentin and c-myc were detected by western blot after overexpression EZH2 in LoVo cells.
